# Supplementary material for: Alginate surfactant derivatives as an ecofriendly corrosion inhibitor for carbon steel in acidic environments
Source: Royal Society of Chemistry journal article supplement (doi:10.1039/c5ra20340f), 2015-01-01
Supplement: c5ra20340f1.pdf [file c5ra20340f1.pdf]

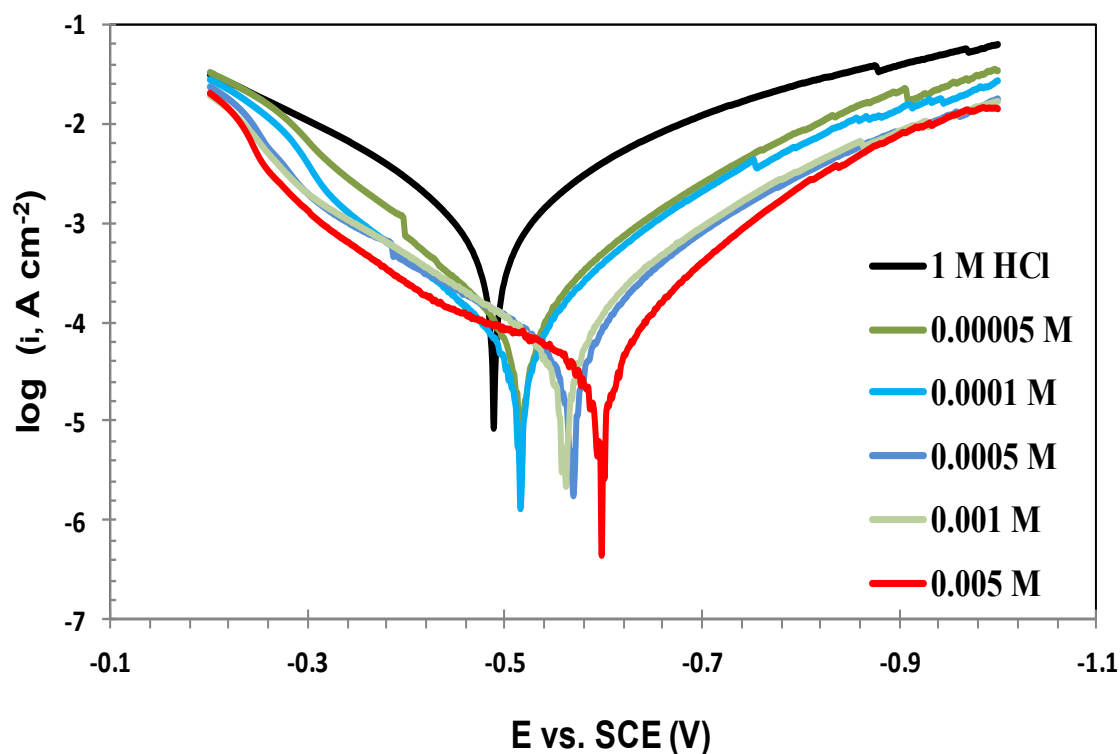

Fig. 1. Polarization curves for carbon steel in 1 M HCl in the absence and presence of different concentrations of inhibitor (AS-Zn) at 25 °C.

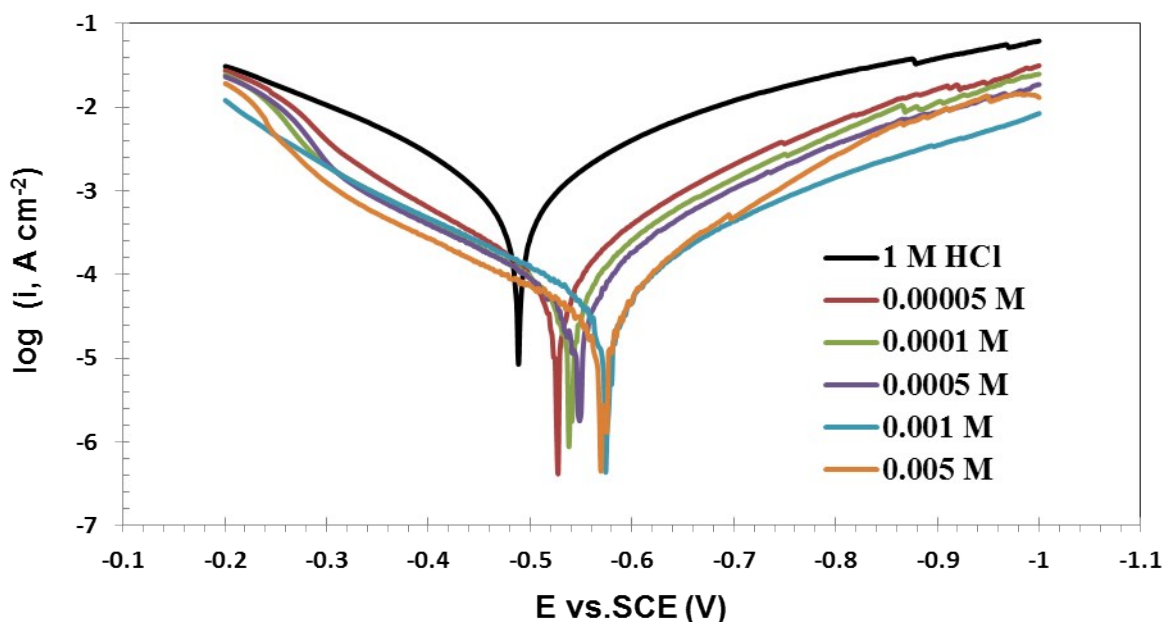

Fig. 2. Polarization curves for carbon steel in 1 M HCl in the absence and presence of different concentrations of inhibitor (AS-Co) at 25 °C.

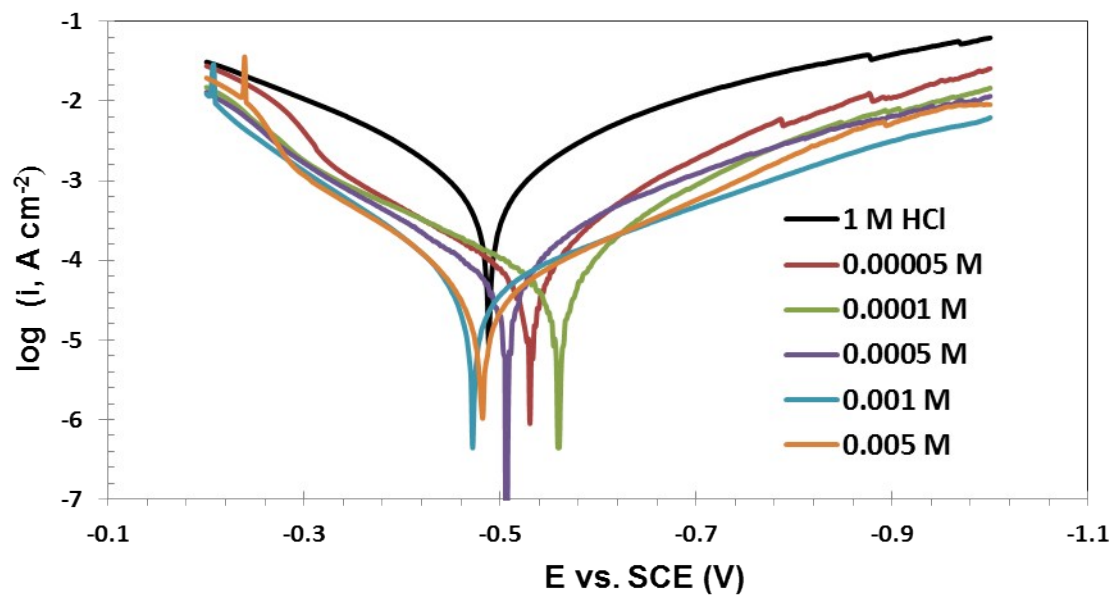

**Fig. 3.** Polarization curves for carbon steel in 1 M HCl in the absence and presence of different concentrations of inhibitor (AS-Cu) at 25 °C.

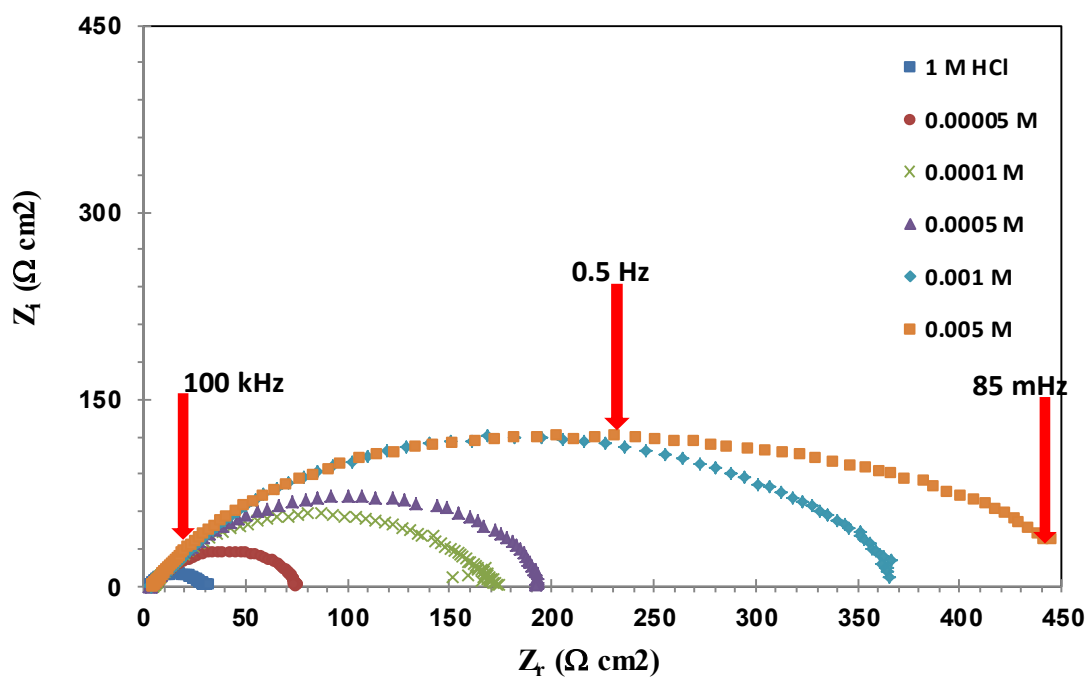

Fig. 4. Nyquist plots for CS in 1 M HCl in absence and presence of different concentrations of inhibitor (AS-Zn) at 25 °C

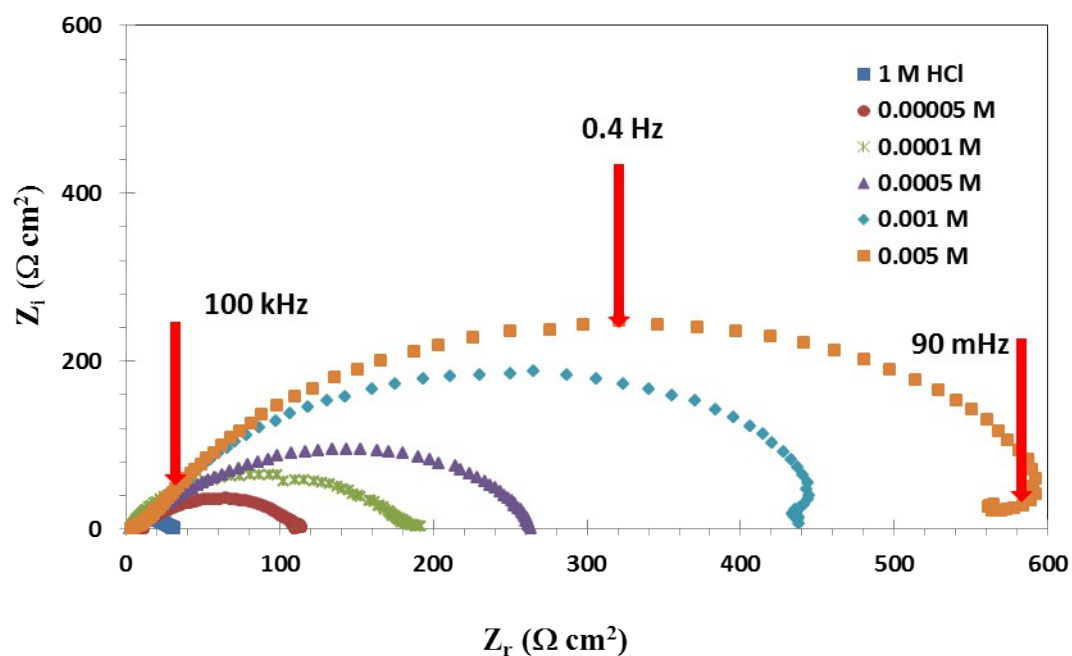

Fig. 5. Nyquist plots for CS in 1 M HCl in absence and presence of different concentrations of inhibitor (AS-Co) at 25 °C

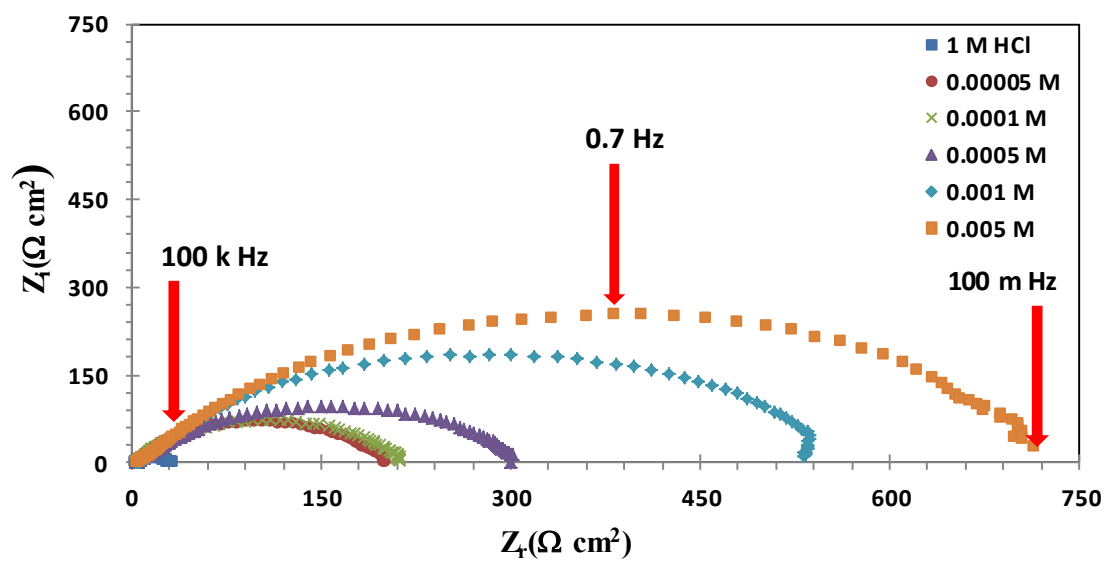

Fig. 6. Nyquist plots for CS in 1 M HCl in absence and presence of different concentrations of inhibitor (AS-Cu) at 25 °C

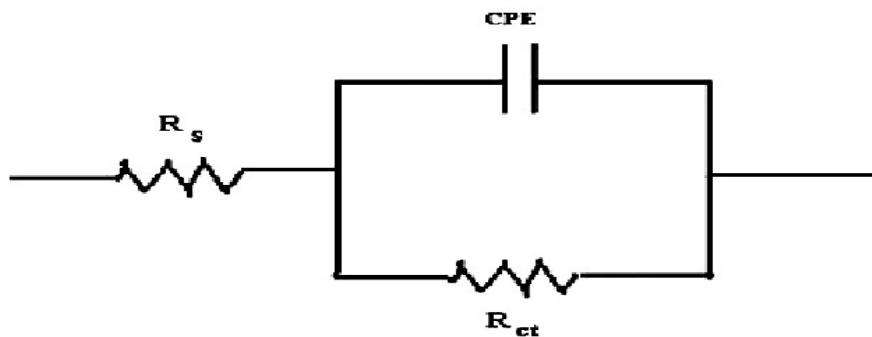

Fig. 7. Electrical equivalent circuit used for modeling the interface Fe/1 M HCl solution without and with the synthesized surfactant inhibitors.

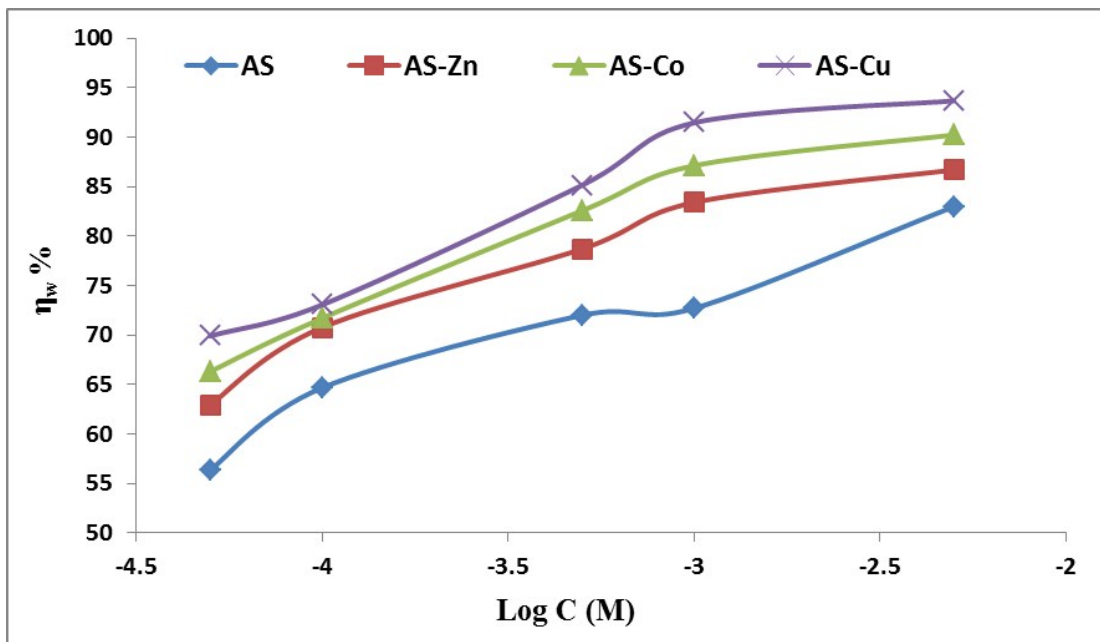

Fig. 8. Variation of the inhibition efficiency with different concentrations of the synthesized inhibitors in 1 M HCl at 25 °C.

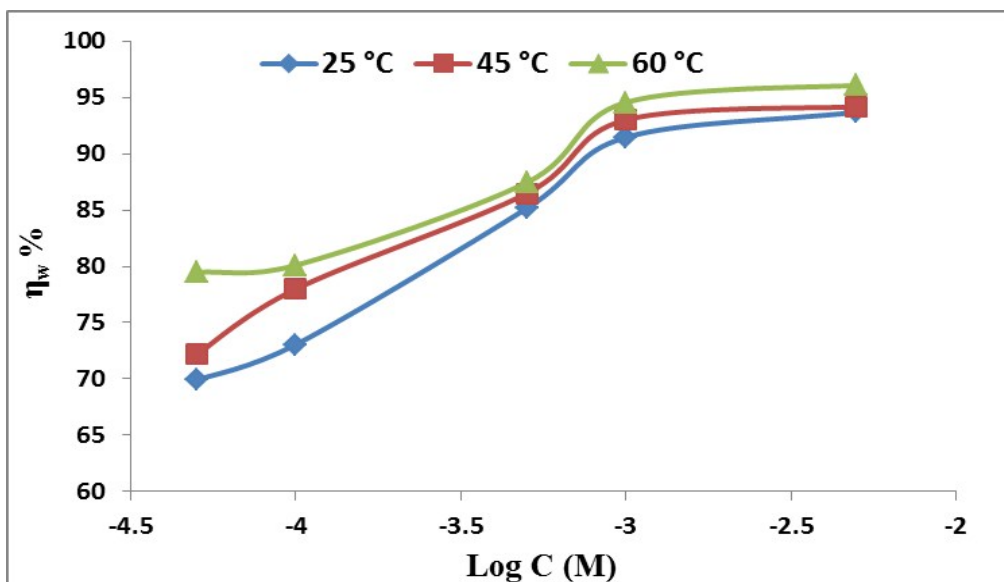

Fig. 9. Effect of the temperature on the inhibition efficiency was obtained by weight loss method for carbon steel in 1 M HCl in presence of different concentrations of inhibitor (AS-Cu).

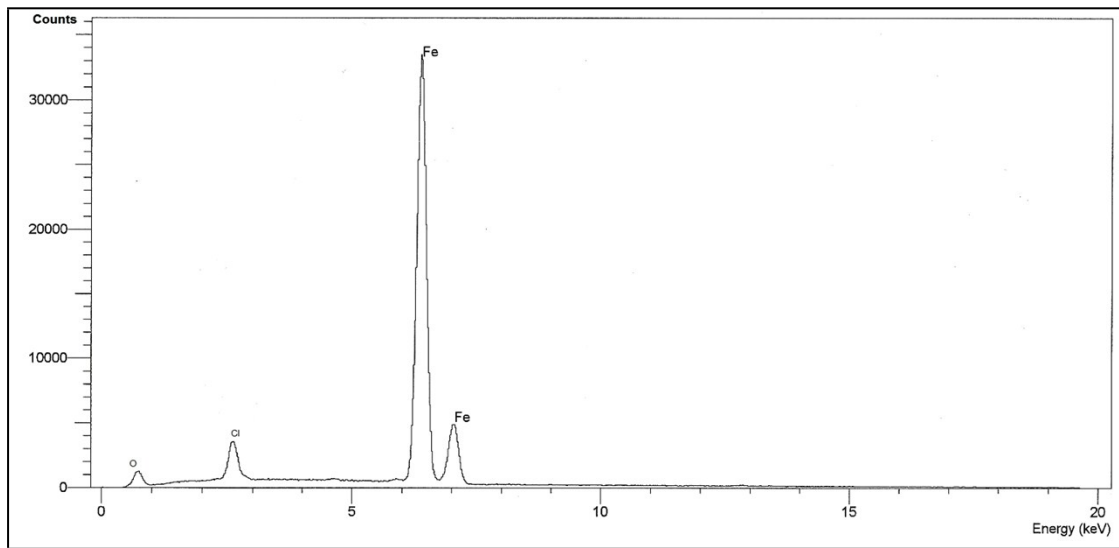

(a)

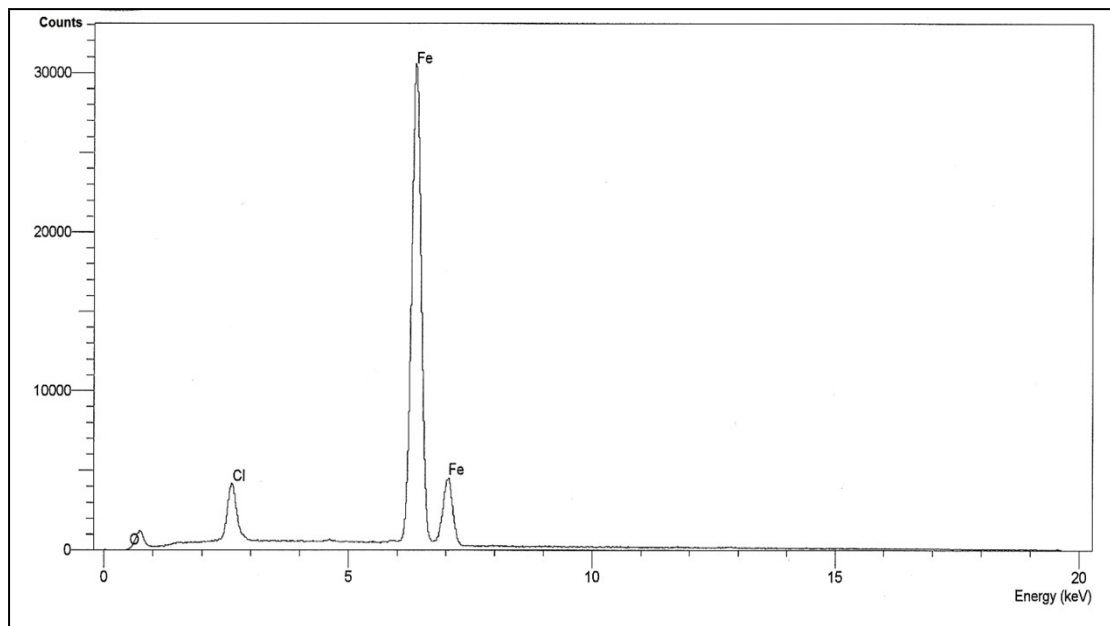

(b)

**Fig. (10):** (a) The EDX spectrum of carbon steel in uninhibited 1.0 M HCl, (b) in presence of  $5 \times 10^{-3}$  M of synthesized alginate surfactant (AS-Cu) in 1.0 M HCl.

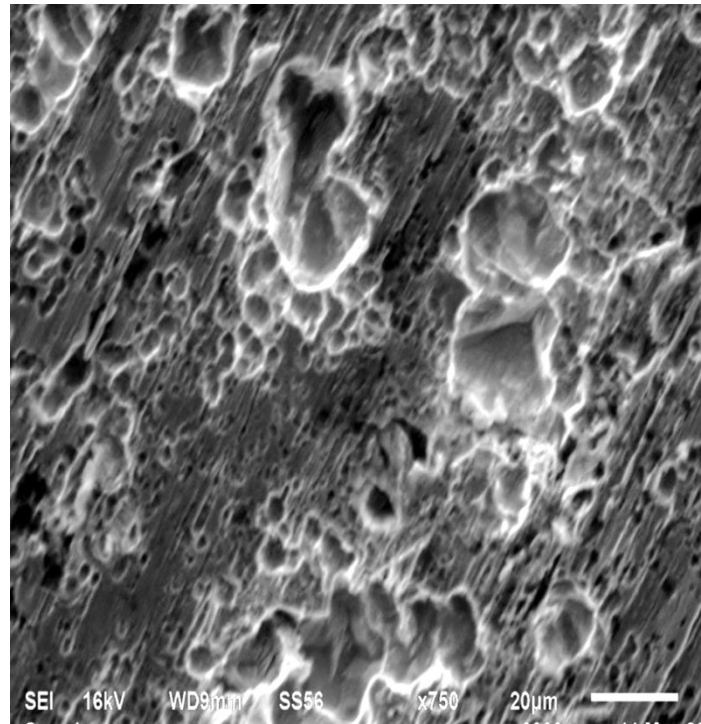

(a)

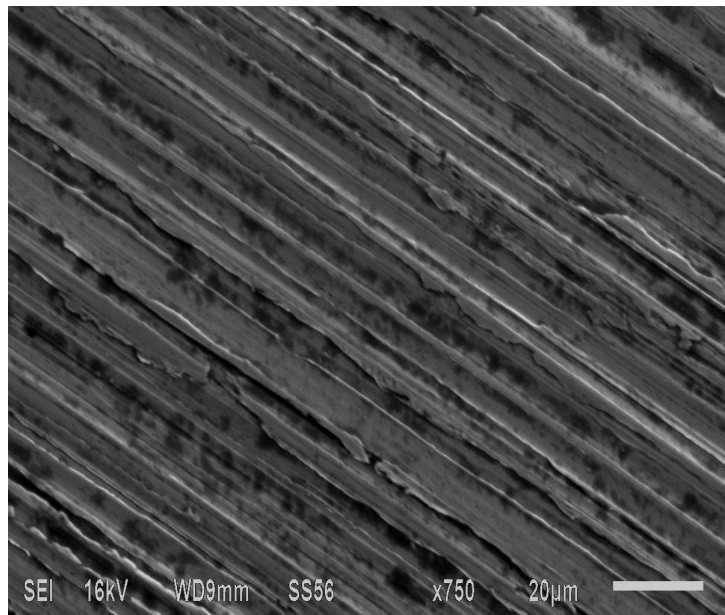

(b)

Fig. 11. SEM image of surface of carbon steel after immersion for 24 h in 1 M HCl at 25 °C in absence (a) and presence of  $5 \times 10^{-3}$  M of AS-Cu(b)
